# Supplementary material for: Differential Expression of Inflammasome-Related Genes in Induced Pluripotent Stem-Cell-Derived Retinal Pigment Epithelial Cells with or without History of Age-Related Macular Degeneration
Source: MDPI journal article supplement (doi:10.3390/ijms22136800), 2021-06-24
Supplement: s1 [file s1]

**Supplementary Figure S1:** Expression levels of inflammasome-related genes determined by PCR Array. RNA from 5 samples extracted in three independent experiments were combined for analysis on 96-well PCR array and data are presented in a bar chart. A) MG-132 + bafilomycin A1-treated control-RPEs and IL-1 $\alpha$ -primed AMD-RPE cells are presented relative to IL-1a primed control RPE-cells (= 1). B) MG-132 + bafilomycin A1 treated control-RPE cells and MG-132 + bafilomycin A1 treated AMD-RPE cells are presented relative to their respective, corresponding IL-1a primed controls (= 1). Genes are grouped into groups according to the instructions provided by the PCR array manufacturer.
